# Supplementary material for: Soil Effects on the Bioactivity of Hydroxycoumarins as Plant Allelochemicals
Source: MDPI journal article supplement (doi:10.3390/plants12061278), 2023-03-10
Supplement: s1 [file s1]

Supplementary material for

**Soil effects on the bioactivity of hydroxycoumarins as plant allelochemicals**

Gracia Facenda, Miguel Real, Jose A. Galán-Pérez, Beatriz Gámiz\* and Rafael Celis

*Instituto de Recursos Naturales y Agrobiología de Sevilla (IRNAS), CSIC, Avenida Reina Mercedes 10, 41012 Sevilla, Spain*

**\*Corresponding Author:** B. Gámiz

**Address:** Instituto de Recursos Naturales y Agrobiología de Sevilla (IRNAS), CSIC

Avenida Reina Mercedes 10, 41012 Seville, Spain

**E-mail:** bgamiz@irnase.csic.es

**Table S1.** Log-logistic 3-parameter constants for the effect of umbelliferone on the aerial biomass of *Lactuca sativa*, *Eruca sativa*, and *Hordeum vulgare* in bioassays conducted in the presence of two soils.

|                        | $y_0$<br>(%)  | $b$               | $IC_{50}$<br>(mg/l) | $R^2$ |
|------------------------|---------------|-------------------|---------------------|-------|
| <i>Lactuca sativa</i>  |               |                   |                     |       |
| Soil 1                 | $102 \pm 7^a$ | $1.639 \pm 0.349$ | $76 \pm 12$         | 0.984 |
| Soil 2                 | $101 \pm 3$   | $4.026 \pm 0.939$ | $393 \pm 17$        | 0.971 |
| <i>Eruca sativa</i>    |               |                   |                     |       |
| Soil 1                 | $102 \pm 6$   | $1.489 \pm 0.258$ | $154 \pm 20$        | 0.978 |
| Soil 2                 | $98 \pm 1$    | $3.925 \pm 0.376$ | $412 \pm 8$         | 0.995 |
| <i>Hordeum vulgare</i> |               |                   |                     |       |
| Soil 1                 | $100 \pm 5$   | $0.897 \pm 0.161$ | $169 \pm 26$        | 0.980 |
| Soil 2                 | $96 \pm 4$    | $6.821 \pm 2.250$ | $380 \pm 16$        | 0.943 |

<sup>a</sup> Value  $\pm$  standard error of the calculated parameter.

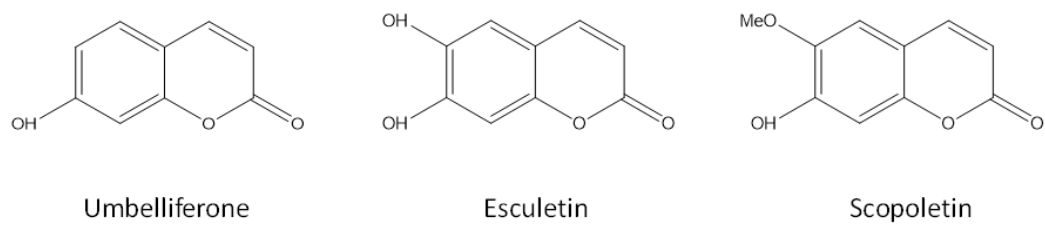

**Figure S1.** Chemical structures of umbelliferone, esculetin, and scopoletin.

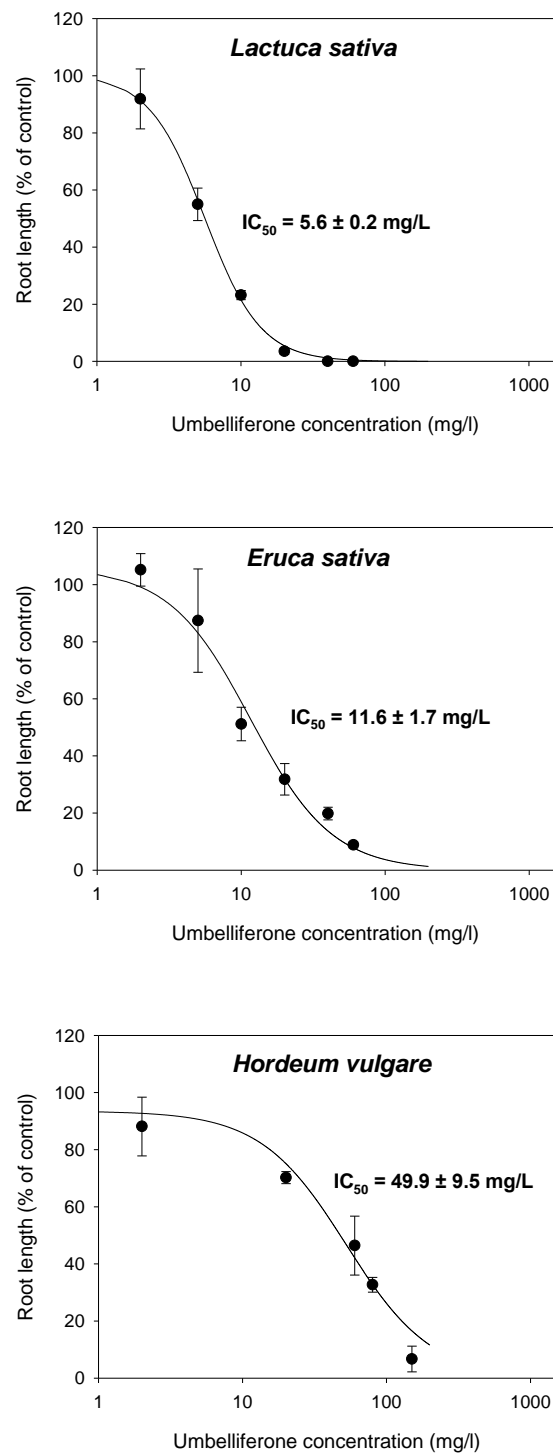

**Figure S2.** Dose-response curves for the inhibitory effect of umbelliferone on root growth of *Lactuca sativa*, *Eruca sativa*, and *Hordeum vulgare* under Petri-dish conditions (t = 6 days).

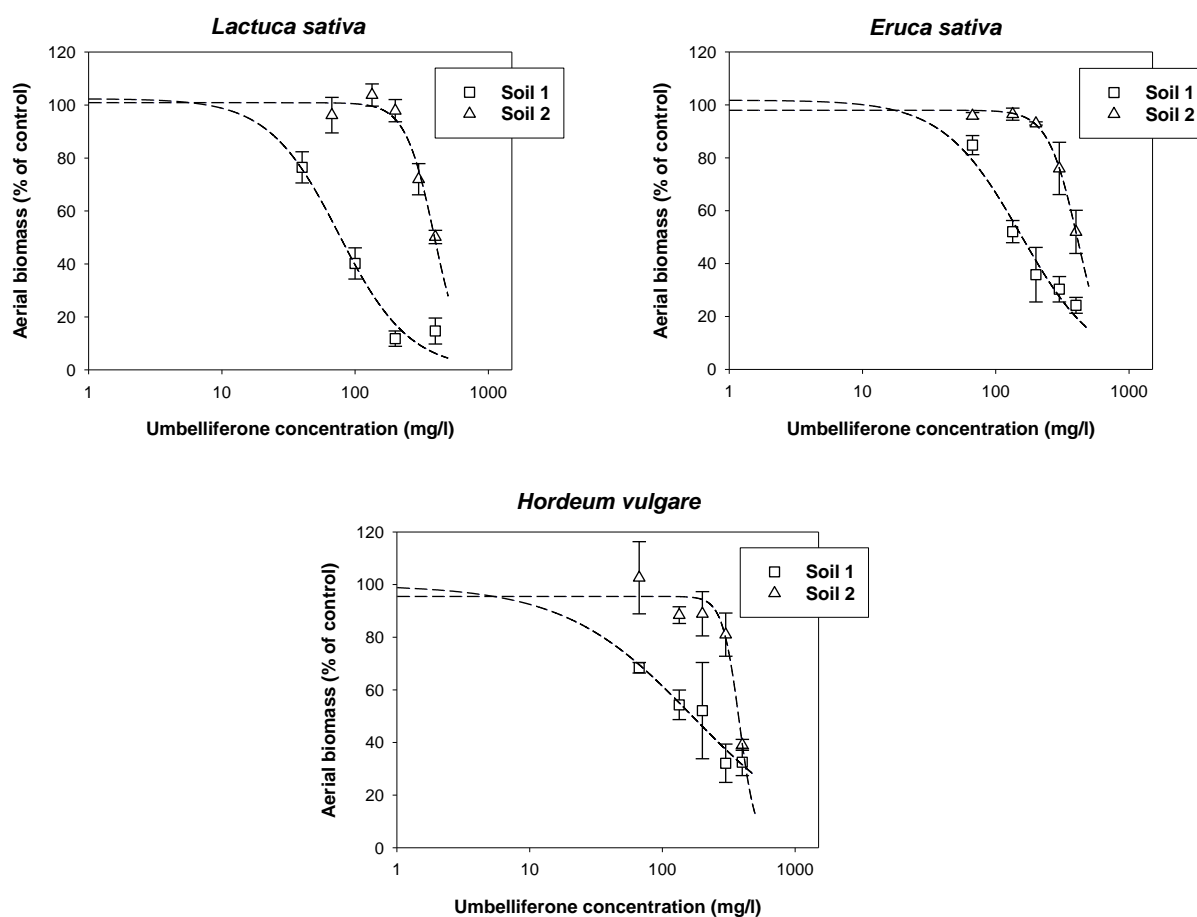

**Figure S3.** Dose-response curves for the inhibitory effect of umbelliferone on the aerial biomass of *Lactuca sativa*, *Eruca sativa*, and *Hordeum vulgare* in the presence of two soils (t= 6 days).
